# Supplementary material
Source: publisher figshare collection journal article supplement (https://karger.figshare.com/articles/dataset/_/5122936)
Supplement: Supplementary file 1 [file 1]

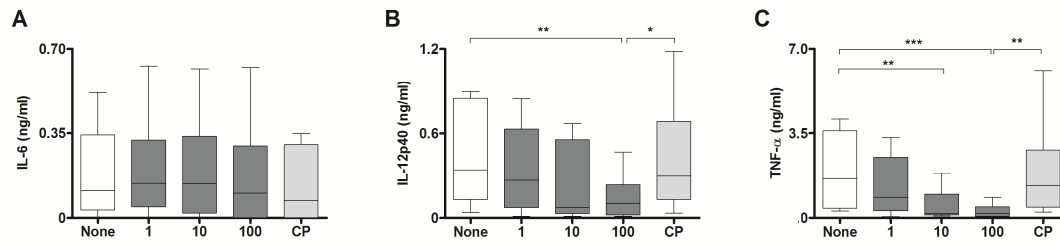

**Fig. 2s Cytokine profiles of hLF1-11-differentiated and control (peptide-differentiated) dendritic cells in response to LTA**

Monocytes were cultured with rhGM-CSF and IL-4 in the presence of hLF1-11 (1, 10, 100  $\mu\text{g/ml}$ ; dark gray bars) or control peptide (CP, 100  $\mu\text{g/ml}$ ; light gray bars) for 6 days. Thereafter, cells were stimulated with 1  $\mu\text{g/ml}$  LTA for 20 h and then supernatants were collected and assessed for IL-6 (A), IL-10, IL-12p40 (B) and TNF- $\alpha$  (C) levels. No IL-10 levels were detected. Values are expressed as fold increase of cytokine production compared to control DCs (none, no peptide; open bars). Data are expressed as boxes and whiskers, boxes represent medians and second and third interquartiles, whiskers represent range within experiments with 8 different donors. \*,  $p < 0.05$ ; \*\*,  $p < 0.01$ ; \*\*\*,  $p < 0.001$  as compared to control and control peptide-incubated DCs.
