# Supplementary material
Source: publisher figshare collection journal article supplement (https://karger.figshare.com/articles/dataset/_/5122936)
Supplement: Supplementary file 2 [file 1]

Archive with 3 entries (3 files):
- 000332941_sm_Figure1.pdf
- 000332941_sm_Figure2.pdf
- 000332941_sm_Figures.pdf
